1 **Rotavirus NSP1 contributes to intestinal viral replication, pathogenesis, and**  
2 **transmission**

3

4 Gaopeng Hou<sup>1</sup>, Qiru Zeng<sup>1</sup>, Jelle Matthijnsens<sup>2</sup>, Harry B. Greenberg<sup>3,4</sup>, Siyuan Ding<sup>1</sup>

5

6 <sup>1</sup>Department of Molecular Microbiology, Washington University School of Medicine, St.  
7 Louis, MO, USA.

8 <sup>2</sup>KU Leuven-University of Leuven, Department of Microbiology, Immunology and  
9 Transplantation, Rega Institute for Medical Research, Leuven, Belgium.

10 <sup>3</sup>VA Palo Alto Health Care System, Department of Veterans Affairs, Palo Alto, CA, USA.

11 <sup>4</sup>Department of Medicine, Division of Gastroenterology and Hepatology, and Department  
12 of Microbiology and Immunology, Stanford School of Medicine, Stanford, CA, USA.

13

14 Correspondence: Siyuan Ding, [siyuan.ding@wustl.edu](mailto:siyuan.ding@wustl.edu)

15

16 **ABSTRACT**

17

18 Rotavirus (RV)-encoded non-structural protein 1 (NSP1), the product of gene segment 5,  
19 effectively antagonizes host interferon (IFN) signaling via multiple mechanisms. Recent  
20 studies with the newly established RV reverse genetics system indicate that NSP1 is not  
21 essential for the replication of simian RV SA11 strain in cell culture. However, the role of  
22 NSP1 in RV infection *in vivo* remains poorly characterized due to the limited replication  
23 of heterologous simian RVs in the suckling mouse model. Here, we used an optimized  
24 reverse genetics system and successfully recovered recombinant murine RVs with or  
25 without NSP1 expression. While the NSP1-null virus replicated comparably with the  
26 parental murine RV in IFN-deficient and IFN-competent cell lines *in vitro*, it was highly  
27 attenuated in 5-day-old wild-type suckling pups. In the absence of NSP1 expression,  
28 murine RV had significantly reduced replication in the ileum, systemic spread to  
29 mesenteric lymph nodes, fecal shedding, diarrhea occurrence, and transmission to  
30 uninoculated littermates. Of interest, the replication and pathogenesis defects of NSP1-  
31 null RV were only minimally rescued in *Stat1* knockout pups, suggesting that NSP1  
32 facilitates RV replication in an IFN-independent manner. Our findings highlight a pivotal  
33 function of NSP1 during homologous RV infections *in vivo* and identify NSP1 as an ideal  
34 viral protein for targeted attenuation for future vaccine development.

35

36 **IMPORTANCE**

37

38 Rotavirus remains one of the most important causes of severe diarrhea and dehydration  
39 in young children worldwide. Although NSP1 is dispensable for rotavirus replication in cell  
40 culture, its exact role in virus infection *in vivo* remains unclear. In this study, we  
41 demonstrate that in the context of a fully replication-competent, pathogenic, and

42 transmissible murine rotavirus, loss of NSP1 expression substantially attenuated virus  
43 replication in the gastrointestinal tract, diarrheal disease, and virus transmission in  
44 suckling mice. Notably, the NSP1-deficient murine rotavirus also replicated poorly in mice  
45 lacking host interferon signaling. Our data provide the first piece of evidence that NSP1  
46 is essential for murine rotavirus replication *in vivo*, making it an attractable target for  
47 developing improved next-generation rotavirus vaccines better suited for  
48 socioeconomically disadvantaged and immunocompromised individuals.

49

## 50 INTRODUCTION

51

52 Despite a dramatic reduction of rotavirus (RV) associated morbidity and mortality  
53 following the introduction of multiple safe and effective RV vaccines, group A RVs remain  
54 a major cause of life-threatening gastroenteritis among young children from 1 month to 5  
55 years old (1, 2). RV infections still result in approximately 128,500-215,000 deaths  
56 annually worldwide (3, 4). RV vaccine option is also limited for the immunocompromised  
57 children due to the risk of persistent shedding and diarrhea (5). Thus, there remains an  
58 urgent need to develop more effective vaccines, especially for the immunosuppressed  
59 individuals.

60

61 Although RV infections in mammals occur frequently (6), RV isolates from one host  
62 species generally replicate less efficiently in heterologous species. Several RV-encoded  
63 factors, including VP3, VP4, NSP1, NSP2, and NSP3, have been implicated in  
64 contributing to this host range restriction phenotype (7). Among these viral proteins, NSP1  
65 has been identified as an interferon (IFN) antagonist with several distinct mechanisms  
66 that enhances virus replication (8-12). NSP1 from many animal RV strains binds to and  
67 promotes the proteasomal degradation of interferon regulatory factor 3 (IRF3) (9, 13).  
68 NSP1 also recognizes and degrades IRF5, IRF7, and IRF9 (14, 15). NSP1 from several  
69 human and porcine RV strains binds to the host cullin-3 E3 ligase complex (16) and  
70 induces  $\beta$ -transduction repeat containing protein ( $\beta$ -TrCP) degradation (17). In addition,  
71 NSP1 can directly target signal transducer and activator of transcription 1 (STAT1)  
72 phosphorylation and/or translocation into the nucleus to further block the IFN amplification  
73 pathway (10, 18). Taken together, all of these studies have established NSP1 as a potent  
74 inhibitor of the host IFN responses to facilitate RV replication.

75

76 With the development of a new plasmid-based RV reverse genetics (RG) system, several  
77 groups successfully rescued recombinant simian RVs (SA11 strain), including one in  
78 which NSP1 is almost completely replaced by a NanoLuc luciferase reporter except for  
79 the first 37 amino acids at the N-terminus (19, 20). The replication of this recombinant  
80 SA11 is only modestly lower than the parental SA11 strain in MA104 cells, suggesting  
81 that NSP1 is dispensable for RV infection *in vitro*. However, since heterologous RVs  
82 replicate and spread inefficiently in mice (21), the role of NSP1 in RV infection under

83 physiologically relevant conditions cannot be studied using this system. To overcome this  
84 hurdle, we recently constructed and recovered a fully replication-competent, infectious,  
85 and virulent recombinant murine RV using an optimized RG system (22). In this study, we  
86 take advantage of this modified RG system and further generate a new NSP1-deficient  
87 murine RV to directly address the significance and functional relevance of the NSP1  
88 protein in intestinal replication and pathogenesis *in vivo*.

89

## 90 **RESULTS**

91

### 92 **A recombinant NSP1-deficient murine RV can be successfully rescued via an** 93 **optimized RG system**

94 To determine the role of NSP1 in viral replication *in vivo*, we utilized the recombinant D6/2  
95 murine-like RV backbone with 2 gene segments (1 and 10) derived from the simian RV  
96 SA11 strain and the other 9 gene segments (including NSP1) from the murine RV D6/2  
97 strain (designated hereon as rD6/2-2g) (22). In order to generate an NSP1-deficient  
98 rD6/2-2g virus (rD6/2-2g-NSP1-null), we introduced two pre-mature stop codons in gene  
99 segment 5 by replacing AAG and TGC at the nucleotide positions 43 to 45, and 52 to 55  
100 with TAG and TGA, respectively, via site-directed mutagenesis (**Fig. 1A**). With these  
101 manipulations, the protein product of gene 5 from the rD6/2-2g-NSP1-null infection is  
102 limited to the first 4 amino acids. Using the optimized RG system, we succeeded in  
103 recovering a replication-competent rD6/2-2g-NSP1-null. We next extracted the viral RNA  
104 from sucrose cushion purified RVs and performed the polyacrylamide gel electrophoresis  
105 (PAGE) to analyze the viral genomic dsRNA segments. The genomic dsRNA migration  
106 patterns were identical between rD6/2-2g and rD6/2-2g-NSP1-null viruses, with the genes  
107 1 and 10 from SA11 and the rest 9 genes from D6/2 (**Fig. 1B**). We also validated the  
108 NSP1-null virus by a unique enzymatic digestion site (*Hinfl*) introduced by the second  
109 stop codon. In comparison, cDNA amplified from gene segment 5 of rD6/2-2g was  
110 resistant to *Hinfl* digestion (**Fig. 1C**). Lastly, we examined IRF3 degradation as a  
111 functional readout of murine RV NSP1 expression. To that end, we performed  
112 immunoblotting analysis to examine the cell lysates of MA104 cells infected by rD6/2-2g  
113 and rD6/2-2g-NSP1-null. With similar protein levels of RV VP6, indicating comparable  
114 replication between rD6/2-2g and rD6/2-2g-NSP1-null, the protein levels of IRF3 were  
115 undetectable in rD6/2-2g infected MA104 cells whereas IRF3 was not degraded by rD6/2-  
116 2g-NSP1-null infection (**Fig. 1D**). Based on these results, we demonstrate that the rD6/2-  
117 2g-NSP1-null virus was successfully rescued and did not express the NSP1 protein.

118

### 119 **The replication of a recombinant NSP1-deficient murine RV is comparable to the** 120 **parental murine RV in multiple cell lines**

121 To determine whether the loss of NSP1 protein negatively impacts virus replication in cell  
122 culture, we performed a multi-step growth curve for rD6/2-2g and rD6/2-2g-NSP1-null in  
123 MA104 cells at a multiplicity of infection (MOI) of 0.01. Both focus-forming unit (FFU) and

124 quantitative reverse transcription-polymerase chain reaction (RT-qPCR) assays did not  
125 reveal significant differences between rD6/2-2g and rD6/2-2g-NSP1-null over the time  
126 course (**Fig. 2A and B**). The plaque sizes of rD6/2-2g-NSP1-null (diameter,  $2.07 \pm 0.53$   
127 mm) were significantly smaller than those of rD6/2-2g (diameter,  $4.53 \pm 0.99$  mm) in  
128 MA104 cells (**Fig. 2C**). We also validated the genetic stability of rD6/2-2g-NSP1-null by  
129 serially passaging the virus for 5 times in MA104 cells and confirming the presence of two  
130 stop codons in gene segment 5 (**Fig. 2D**). These results are consistent with the previous  
131 report that an intact NSP1 is not required for simian RV SA11 strain infection in MA104  
132 cells (19, 20).

133

134 Since NSP1 dampens the host IFN responses, which are defective in MA104 cells, we  
135 next tested whether the replication of rD6/2-2g-NSP1-null is restricted in IFN-competent  
136 cell lines. We examined the growth kinetics of rD6/2-2g and rD6/2-2g-NSP1-null in two  
137 different cell types: HEK293 and HAP1 cells, which are human embryonic fibroblastic cell  
138 line and human myeloid leukemia cell line, respectively. Although these cells mount  
139 robust type I and III IFN responses to RV infection (23), rD6/2-2g-NSP1-null still replicated  
140 comparably to rD6/2-2g in these IFN-competent cell lines (**Fig. 3A and B**), suggesting  
141 that NSP1 is dispensable for murine RV replication in a cell-type independent manner.

142

#### 143 **Loss of NSP1 severely attenuates murine RV replication in 129sv suckling mice**

144 To compare the replication, pathogenesis, and spread of rD6/2-2g and rD6/2-2g-NSP1-  
145 null in an *in vivo* environment, we orally inoculated 5-day-old wild-type 129sv suckling  
146 mice with  $1.5 \times 10^3$  FFUs of rD6/2-2g or rD6/2-2g-NSP1-null and monitored the diarrheal  
147 development from day 1 to 12 post infection. While the diarrhea occurrence from the  
148 rD6/2-2g infected group was consistently higher than 70% for the first 10 days, rD6/2-2g-  
149 NSP1-null caused minimal to no diarrhea in infected animals for the first 2 days (**Fig. 4A**).  
150 Starting from 3 days post infection (dpi), rD6/2-2g-NSP1-null started to approximate the  
151 parental virus, with their curves eventually trending in a similar fashion (**Fig. 4A**). We also  
152 quantified the shedding of infectious RVs in the feces of mouse pups by an FFU assay.  
153 Consistent with the defects in diarrhea, fecal shedding of rD6/2-2g-NSP1-null in infected  
154 mice could not be detected at 1 and 2 dpi, whereas we observed high levels of RV titers  
155 from the rD6/2-2g infection (**Fig. 4B**). The two virus shedding curves looked similar from  
156 3 to 5 dpi, before the RV shedding in rD6/2-2g-NSP1-null infected pups waned again as  
157 compared to that of rD6/2-2g group (**Fig. 4B**). Furthermore, we also evaluated the ability  
158 of these two viruses to transmit to uninfected littermates, an important trait for viruses that  
159 spread fecal-orally. We found that virtually all the non-inoculated littermates of the rD6/2-  
160 2g infected pups developed diarrhea at 6 dpi (**Fig. 4C**). In comparison, the maximal  
161 percentage of diarrhea among mock infected pups in the rD6/2-2g-NSP1-null cage  
162 reached 40% and lasted only 1 day (**Fig. 4C**). Collectively, these results suggest that  
163 NSP1 is necessary for optimal RV infection, disease, and spread *in vivo*.

164

165 To directly investigate whether NSP1 contributes to RV intestinal replication, we collected  
166 all three small intestinal segments (i.e., duodenum, jejunum, and ileum) from rD6/2-2g  
167 and rD6/2-2g-NSP1-null infected pups at 2 dpi and measured viral loads by RT-qPCR.  
168 The number of rD6/2-2g genome copies in the ileum was significantly (about 3 logs)  
169 higher than that of rD6/2-2g-NSP1-null, despite no major differences in the duodenum  
170 and jejunum (**Fig. 5A**). We also found that the viral loads of rD6/2-2g in mesenteric lymph  
171 nodes (MLNs) were higher than that of rD6/2-2g-NSP1-null, whereas no difference were  
172 observed in the blood, bile ducts, or the liver (**Fig. 5B-E**).

173

#### 174 **Revertant NSP1 mutations rescued NSP1-deficient murine RV replication in mice**

175 Notably, we noticed that 4 out of 14 mice from the rD6/2-2g-NSP1-null infected group  
176 shed high amount of infectious viruses in the feces at 3 dpi (**Fig. 4B**). This was  
177 reproducibly observed in two independent sets of experiments (6 out of 7 at 4 dpi in one  
178 experiment and 4 out of 7 at 3 dpi in the other experiment) (**Fig. S1**). To account for this  
179 enhanced replication, we amplified the 5' end of gene 5 (17 to 466 nucleotides) directly  
180 from the stool samples collected from mice that had detectable RV shedding from 1-4 dpi  
181 and performed Sanger sequencing. Of interest, NSP1 fragments amplified from the rD6/2-  
182 2g-NSP1-null infected mice were indistinguishable from those from rD6/2-2g infection  
183 (**Table 1 and Fig. S2**), indicating that RV in the fecal specimens readily reverted back to  
184 the wild-type sequences. While we could not detect any RV shedding from rD6/2-2g-  
185 NSP1-null infected mice at 1 or 2 dpi, 3 out of the 4 mice that shed infectious RVs at 3  
186 dpi had complete NSP1 reversion mutations and 1 had incomplete reversion (**Table 1**  
187 **and Fig. S2**). 6 out of 14 mice infected with rD6/2-2g-NSP1-null shed virus at 4 dpi and  
188 all 6 animals had wild-type NSP1 sequences (**Table 1 and Fig. S2**). These data are  
189 consistent with our observation that the rD6/2-2g-NSP1-null infected mice unexpectedly  
190 developed diarrhea starting from 3 dpi and further emphasize an indispensable role that  
191 NSP1 protein plays during virus replication *in vivo*.

192

#### 193 **The blunted replication and pathogenesis of the recombinant NSP1-deficient** 194 **murine RV is only partially recovered in the *Stat1* knockout mice**

195 Since NSP1 functions as a highly potent IFN antagonist *in vitro*, we reasoned that rD6/2-  
196 2g-NSP1-null may be attenuated in wild-type 129sv mice due to the lack of IFN inhibitory  
197 capacity. To test this hypothesis, we orally infected 5-day-old *Stat1* knockout (KO) 129sv  
198 suckling pups, unable to respond to type I, II, and III IFNs, with  $1.5 \times 10^3$  FFUs of rD6/2-2g  
199 or rD6/2-2g-NSP1-null. For both viruses, the overall diarrheal development patterns in  
200 infected *Stat1* KO 129sv mice resembled those in wild-type mice (**Fig. 6A**). However,  
201 compared to rD6/2-2g infected animals that developed 57% and 100% diarrhea on 1 and  
202 2 dpi, respectively, there was little to no diarrhea from rD6/2-2g-NSP1-null inoculated  
203 animals (**Fig. 6A**). We also evaluated the fecal RV shedding in the infected mice by an  
204 FFU assay. Even in the absence of IFN signaling, at 1 and 2 dpi, RV shedding of rD6/2-  
205 2g remained > 3 logs higher than that from the rD6/2-2g-NSP1-null infection (**Fig. 6B**),



206 suggesting that NSP1 may facilitate RV replication in an IFN-independent manner.

207

208 Consistent with the diarrhea and fecal shedding results, we found that for all the small  
209 intestinal tissues examined, rD6/2-2g-NSP1-null was still severely attenuated compared  
210 to rD6/2-2g in *Stat1* KO mice at 2 dpi (**Fig. 7A**). The viral loads of rD6/2-2g in the ileum  
211 were approximately 7,000-fold higher than those of rD6/2-2g-NSP1-null infected mice  
212 (**Fig. 7A**). Furthermore, rD6/2-2g also had significantly more spread to systemic organs  
213 including the blood, MLNs, bile duct, and liver than rD6/2-2g-NSP1-null (**Fig. 7B-E**).  
214 Collectively, these data indicate that even in a host devoid of IFN signaling, the replication  
215 of a murine RV without NSP1 expression remains highly attenuated *in vivo*.

216

217 Further supporting an IFN-independent role of NSP1 is the fact that rD6/2-2g-NSP1-null  
218 also reverted back to the wild-type sequences in *Stat1* KO mice. We surveyed over 30  
219 fecal samples from the rD6/2-2g-NSP1-null infected mice. Out of the 8 mice that shed  
220 infectious RVs at 1 dpi, 2 had complete NSP1 revertant mutations and the other 6 mice  
221 had incomplete reversion (**Table 1 and Fig. S2**). At 4 dpi, 8 out of the 10 mice that have  
222 substantial fecal shedding had viruses with wild-type NSP1 sequences (**Table 1 and Fig.**  
223 **S2**). Therefore, all NSP1-deficient viruses reached 100% reversion in *Stat1* KO 129sv  
224 mice by 4 dpi, the same as that in the wild-type 129sv mice.

225

### 226 **The attenuated replication of the recombinant NSP1-deficient simian RV SA11 is** 227 **not rescued in *Stat1* KO mice**

228 To further corroborate the unexpected finding that NSP1 is required for RV replication in  
229 *Stat1* KO mice, we turned to the heterologous simian RV SA11 strain that leads to low  
230 but detectable fecal shedding when the mice are inoculated at a high dose ( $1 \times 10^7$  PFUs)  
231 (21). We successfully rescued an NSP1-deficient SA11 (rSA11-NSP1-null), which was  
232 given to 5-day-old wild-type and *Stat1* KO 129sv mice in direct comparison to the parental  
233 rSA11 at  $1 \times 10^7$  PFUs. The overall trends of diarrheal development between rSA11 and  
234 rSA11-NSP1-null in wild-type 129sv mice were similar (**Fig. 8A**). In *Stat1* KO mice, both  
235 viruses developed less diarrhea than in the wild-type animals but the rSA11-NSP1-null  
236 seemed to be even more attenuated than rSA11 (**Fig. 8A**). We also quantified RV antigen  
237 shedding in the stool samples collected from rSA11 or rSA11-NSP1-null infected mice by  
238 an enzyme-linked immunosorbent assay (ELISA). While neither virus had detectable  
239 shedding in wild-type pups, we observed that rSA11 but not rSA11-NSP1-null resulted in  
240 transient shedding between 4-6 dpi (**Fig. 8B**). Consistently, we found higher viral loads in  
241 the small intestines of rSA11 infection compared to rSA11-NSP1-null infection of *Stat1*  
242 KO mice (**Fig. 8C**). Taken together, these data suggest that despite limited replication  
243 ability, the heterologous simian RV SA11 strain is also attenuated without NSP1  
244 expression in IFN-deficient animals, resembling what we observed with homologous  
245 murine RV infections.

246

## 247 DISCUSSION

248

249 In this study, we exploited a recently developed and further optimized plasmid-based RG  
250 system to examine the role of NSP1 in RV replication *in vivo*. Previous studies showed  
251 that naturally isolated RV SA11-5S and SA11-30-1A variants (24), and some RG rescued  
252 recombinant RVs, albeit unable to induce IRF3 degradation, replicate efficiently in cell  
253 culture (20). However, because of the limited replication and transmission of non-murine  
254 heterologous RVs in mice (25), until now it is difficult to assess whether NSP1 is required  
255 for RV replication *in vivo*. Here, taking advantage of an optimized RG system, we rescued  
256 an NSP1-deficient murine like rD6/2-2g-NSP1-null (**Fig. 1**), which replicated similarly to  
257 rD6/2-2g in MA104 cells (**Fig. 2A and B**). The plaque size formed by rD6/2-2g-NSP1-null  
258 was, however, much smaller than that of rD6/2-2g (**Fig. 2C**), reminiscent of the data  
259 derived from the SA11 strain (19, 20). The smaller plaque size may reflect a defect in the  
260 efficiency of cell-cell spread.

261

262 The similar growth properties of rD6/2-2g-NSP1-null and rD6/2-2g in MA104 may be due  
263 to IFN-defective MA104 cells, which also supported comparable propagation of the  
264 parental rSA11 strain and recombinant rSA11-dC103 and rSA11-Nluc that both lack an  
265 intact NSP1 expression. The replication of rSA11-Nluc in IFN-competent cells was,  
266 however, much lower than that of rSA11 (19, 26), and this phenotype may be caused by  
267 the missing IRF3 degradation ability of rSA11-dC103 and rSA11-Nluc. Thus, in order to  
268 assess whether NSP1 was important to murine RV replication in IFN-competent cells, we  
269 examined the growth curves of rD6/2-2g-NSP1-null and rD6/2-2g in HEK293 and HAP1  
270 cells. Intriguingly, these two viruses still exhibited similar replication properties (**Fig. 3**).  
271 Although we observed a 3-4-fold higher titer of rD6/2-2g in HAP1 cells at 48 h post  
272 infection, there were no statistically significant differences at any other time points (**Fig.**  
273 **3**). These results raise the possibilities that another RV protein may compensate for the  
274 loss of NSP1 or that the IFN-mediated antiviral activities are both cell type and virus strain-  
275 specific.

276

277 Recent studies have reported that the recombinant murine-like RV (rD6/2-2g) replicate  
278 robustly in the small intestines of 129sv suckling pups, that rD6/2-2g infection causes  
279 diarrheal diseases, and that the transmission efficiency of rD6/2-2g is similar to that of the  
280 original reassortant murine RV D6/2 strain (22). Here, we orally inoculated the 129sv mice  
281 with rD6/2-2g or rD6/2-2g-NSP1-null. The lower percentage of diarrheal disease and  
282 lower titer of RV shedding in rD6/2-2g-NSP1-null infected pups at the early time points  
283 revealed that NSP1 protein is important for virus pathogenesis *in vivo*. However, starting  
284 on day 3 post infection, the curves of diarrhea and virus shedding of rD6/2-2g-NSP1-null  
285 approached those of rD6/2-2g parental strain. This observation led us to ask whether the  
286 rD6/2-2g-NSP1-null reverted to wild type rD6/2-2g, despite the presence of two stop  
287 codons inserted at the very beginning of NSP1 open reading frame. To our surprise, all

288 of the gene 5 segments amplified from rD6/2-2g-NSP1-null infected 129sv mice examined  
289 at 4 dpi had completely reverted to wild-type sequences. We performed the infection  
290 experiments with rD6/2-2g and rD6/2-2g-NSP1-null at different time points, and these  
291 data were repeated in two independent experiments (**Fig. S1**), thus the reversion  
292 observed in rD6/2-2g-NSP1-null inoculated mice is unlikely due to the contamination by  
293 rD6/2-2g. We also amplified NSP1 from fecal specimens obtained on days 1-4 post  
294 infection from *Stat1* KO 129sv mice. 2 out of 8 mice had complete NSP1 reversion  
295 mutations and the remaining 6 had incomplete reversion as early as 1 dpi; meanwhile, all  
296 the 8 *Stat1* KO 129sv mice had complete NSP1 reversion mutations at 4 dpi (**Table 1**  
297 **and Fig. S2**). These results emphasized the essential role of NSP1 protein during RV  
298 replication *in vivo*. We found significantly higher levels of rD6/2-2g in the small intestines,  
299 blood, MLNs, bile duct, and liver than rD6/2-2g-NSP1-null infected *Stat1* KO 129sv mice  
300 on 2 dpi (**Fig. 7**), although the only statistically significant differences examined in the  
301 wild-type 129sv mice on 2 dpi were the ileum and MLNs (**Fig. 5**). We found that the  
302 replication of rD6/2-2g in small intestines and systemic organs in *Stat1* KO 129sv mice  
303 was about 10-fold higher than in wild-type 129sv mice, but the replication of rD6/2-2g-  
304 NSP1-null in these tissues in wild-type 129sv mice was similar to that of *Stat1* KO 129sv  
305 mice (**Fig. 5 and 7**). These data suggest that NSP1 protein contributes to virus replication  
306 but this contribution appears to be independent of IFN signaling during RV infection *in*  
307 *vivo*. We also found that the replication of the heterologous rSA11-NSP1-null and rSA11  
308 simian RVs was comparable in wild-type 129sv mice, but the replication of rSA11 was  
309 increased in *Stat1* KO 129sv mice (**Fig. 8**). Unlike rD6/2-2g, we did not see a recovery of  
310 rSA11-NSP1-null in wild-type mice, probably because the replication level was too low to  
311 permit generation and selection of sufficient mutations by the viral polymerase.

312  
313 In conclusion, this study identifies the importance of the NSP1 protein in promoting virus  
314 replication *in vivo*. Our data suggest that NSP1 not only inhibits the IFN response but may  
315 also acts to block some other antiviral signaling pathways or facilitates virus replication  
316 independent of IFN signaling. For instance, Nlrp9b inflammasome also restricts RV  
317 infection in intestinal epithelial cells, but whether this phenotype was related to NSP1 is  
318 still unknown (27). In future studies, it will be interesting to investigate the exact domains  
319 of NSP1 responsible for its pro-viral replication functions *in vivo*. In addition, since NSP1  
320 is involved in RV host range restriction, one can study the NSP1 functionality in the  
321 context of a homologous virus infection by replacing the murine RV NSP1 with NSP1s  
322 derived from heterologous RV strains. With an optimized RG system and fully virulent  
323 murine RVs, we expect to uncover the physiological functions of other RV-encoded viral  
324 factors. We anticipate that a deeper understanding of the rotavirus-host interactions and  
325 rotavirus pathogenesis *in vivo* will guide the development of novel next-generation RV  
326 vaccine candidates with improved efficacy in developing countries and higher  
327 compatibility with an immunocompromised population.

328



329 **FIGURES and FIGURE LEGENDS**  
 330

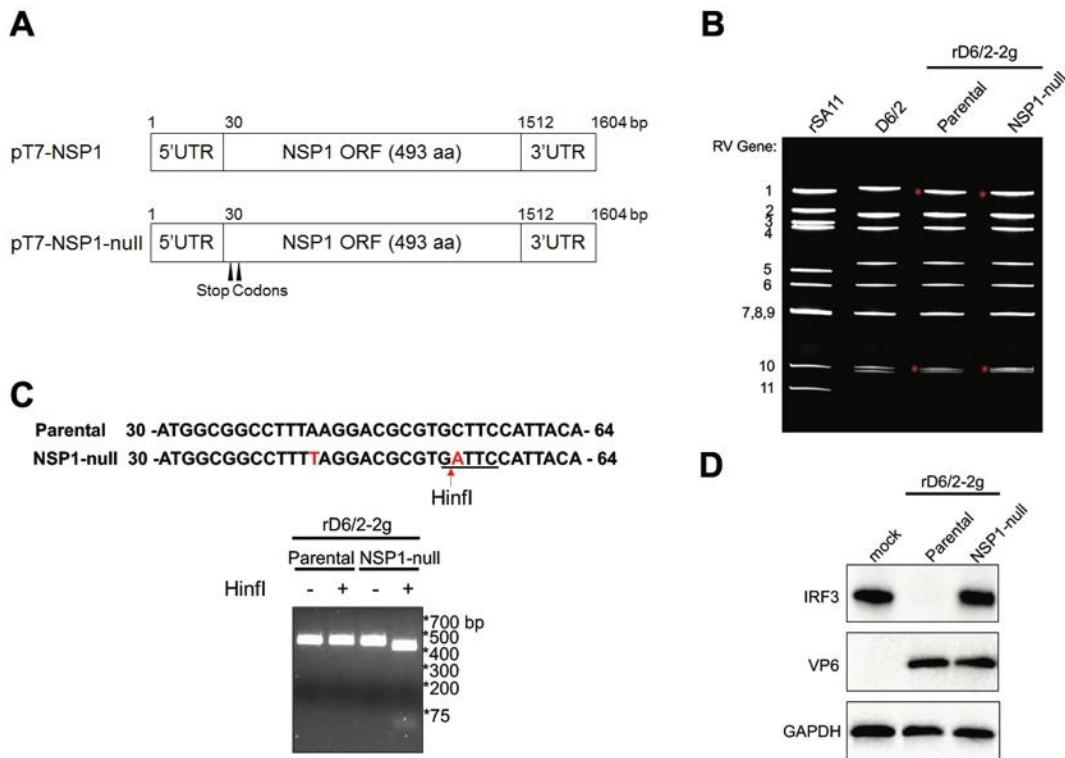

331  
 332  
 333 **Figure 1.** Generation of a recombinant NSP1-deficient murine RV using the optimized  
 334 reverse genetics system. **(A)** Schematics of the plasmids used to rescue rD6/2-2g (pT7-  
 335 NSP1) and NSP1-deficient rD6/2-2g-NSP1-null (pT7-NSP1-null) viruses. To generate the  
 336 rD6/2-2g-NSP1-null, AAG and TGC at the nucleotide positions 43 to 45, and 52 to 55  
 337 were replaced with two stop codons TAG and TGA, which are indicated by the black  
 338 arrowheads. UTR, untranslated region; ORF, open reading frame; bp, base pairs; aa,  
 339 amino acids. **(B)** RNA was extracted from sucrose gradient concentrated indicated RV  
 340 strains, separated on a 4-15% polyacrylamide gel, and stained by ethidium bromide.  
 341 Genes 1 and 10 from SA11 strain were marked by red asterisks. **(C)** The stop codon  
 342 introduced at nucleotides position 52 to 55 creates a unique *Hinfl* digestion site. The  
 343 NSP1 5' end PCR products were digested by *Hinfl* at 37°C for 1 h and separated by a 2%  
 344 agarose gel. **(D)** MA104 cells were infected by parental rD6/2-2g or rD6/2-2g-NSP1-null  
 345 at an MOI of 3 for 6 h. The infected cells were lysed by RIPA buffer and the protein levels  
 346 of IRF3, VP6, and GAPDH in the cell lysates were analyzed by immunoblotting using  
 347 indicated antibodies.

348  
 349  
 350

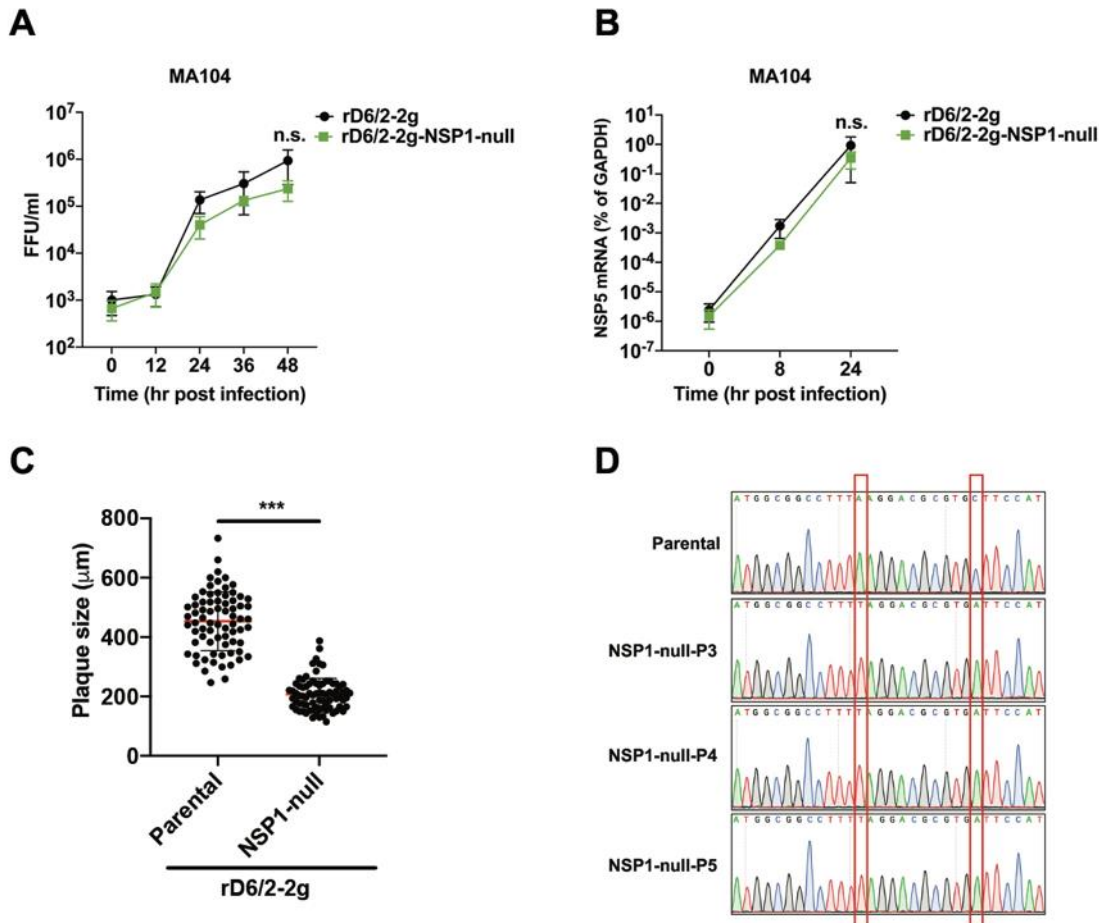

351  
352 **Figure 2.** Replication kinetics of rD6/2-2g and rD6/2-2g-NSP1-null in MA104 cells. (A)  
353 MA104 cells were infected with rD6/2-2g or rD6/2-2g-NSP1-null at an MOI of 0.01  
354 (FFU/cell) for 0, 12, 24, 36, and 48 h. Infected cells were harvested by freezing and  
355 thawing for 3 times. The titer of the propagated viruses at different time points were  
356 determined by an FFU assay. The data displayed were the mean  $\pm$  SD for three different  
357 assays. (B) MA104 cells were infected as described above for 0, 8, and 24 h. RNA was  
358 extracted from infected cells and RT-qPCR was used to measure RV NSP5 transcript  
359 levels in infected cells. The data shown were the mean  $\pm$  SD for three different assays.  
360 (C) Plaque assays were performed for rD6/2-2g or rD6/2-2g-NSP1-null in MA104 cells at  
361 an MOI of 0.01 and individual plaque formation was recorded and measured at 5 dpi by  
362 a bright-field microscope. The data shown are the mean  $\pm$  SD for two different assays.  
363 (D) Indicated recombinant murine RVs were serially passaged 5 times in MA104 cells.  
364 The NSP1 fragments were amplified from the viruses and analyzed by Sanger  
365 sequencing. \*\*\*  $P < 0.001$ ; n.s., not significant (unpaired student's  $t$  test).

366  
367

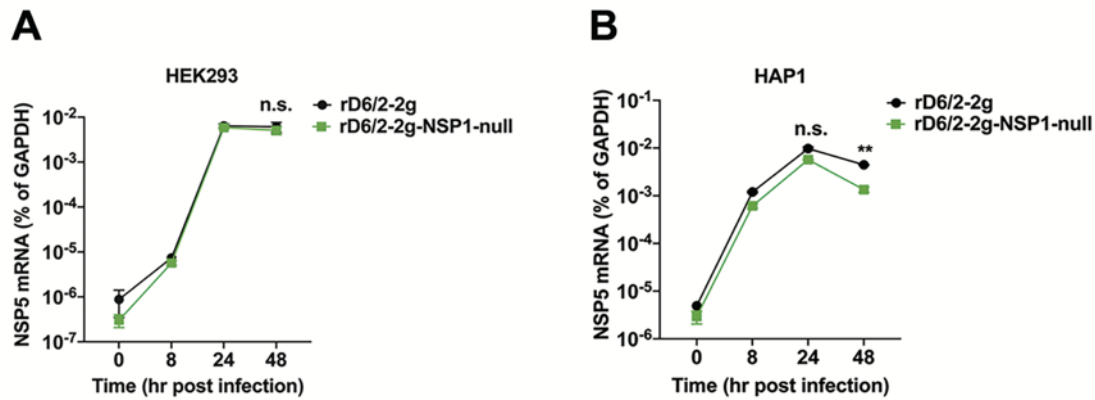

368

369 **Figure 3.** Growth curves of rD6/2-2g and rD6/2-2g-NSP1-null in IFN-competent cells.  
370 HEK293 (**A**) and HAP1 (**B**) cells were infected by rD6/2-2g and rD6/2-2g-NSP1-null at an  
371 MOI of 0.01 for 0, 8, 24, and 48 h. The expression level of NSP5 was quantified by RT-  
372 qPCR. The data shown are the mean  $\pm$  SD for three individual assays. \*\*  $P < 0.01$ ; n.s.,  
373 not significant (unpaired student's  $t$  test).

374

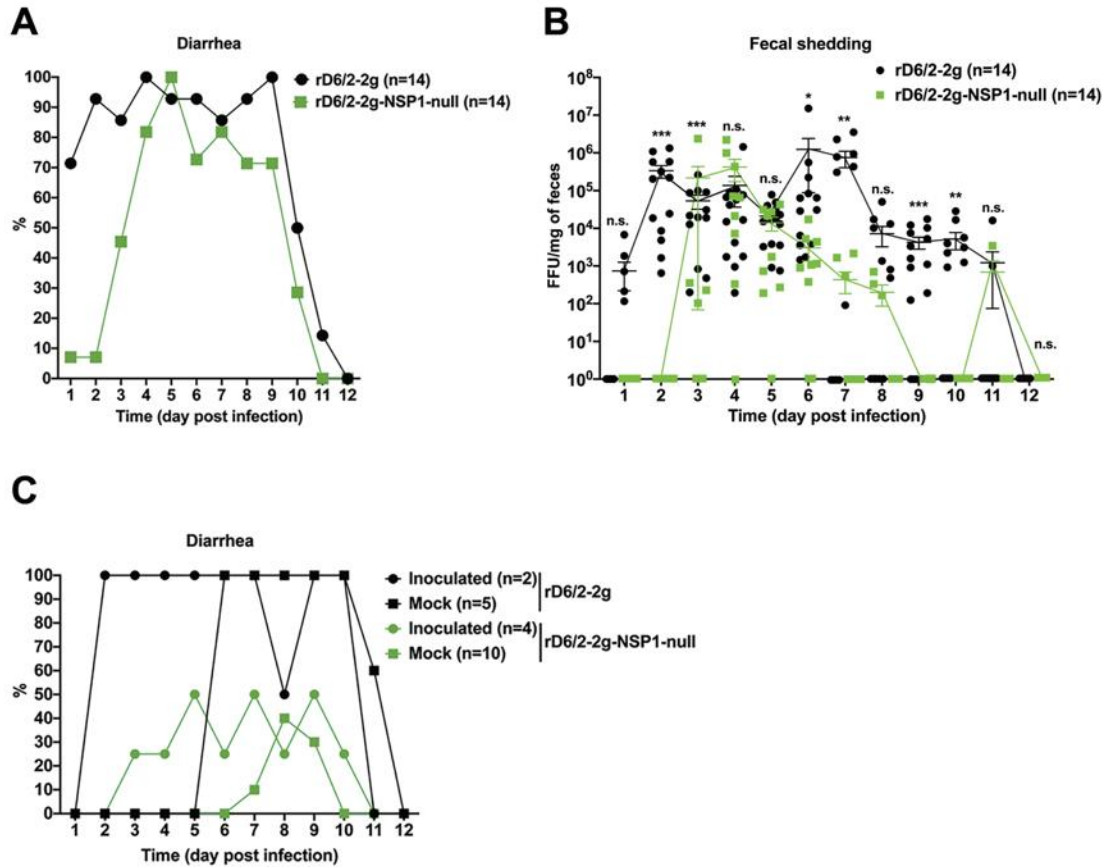

375  
 376 **Figure 4.** Characterization of diarrhea, fecal shedding, and transmission of rD6/2-2g and  
 377 rD6/2-2g-NSP1-null in wild-type 129sv mice. (A) 5-day-old 129sv mice were orally  
 378 inoculated with  $1.5 \times 10^3$  FFUs of rD6/2-2g and rD6/2-2g-NSP1-null. Diarrheal  
 379 development was recorded from day 1 to 12 post infection. N indicates the number of  
 380 mice used in each group. (B) Fecal shedding of the infectious RVs was monitored by an  
 381 FFU assay and normalized by the weight of feces. Virus shedding within the same group  
 382 on each day is shown as mean  $\pm$  SEM. (C) To evaluate the transmission ability of the  
 383 rD6/2-2g, 2 pups were orally infected with  $1.5 \times 10^3$  FFUs of rD6/2-2g, and 5 uninfected  
 384 suckling littermates were co-housed with the inoculated pups in the same cage. For  
 385 rD6/2-2g-NSP1-null, 2 pups in one cage and 2 in another cage were orally infected with  
 386 the rD6/2-2g-NSP1-null described above, and co-housed with 6 and 4 uninoculated pups,  
 387 respectively. Diarrhea was evaluated until 12 dpi as described above. \*  $P < 0.05$ ; \*\*  $P < 0.01$ ;  
 388 \*\*\*  $P < 0.001$ ; n.s., not significant (two-way ANOVA test).

389

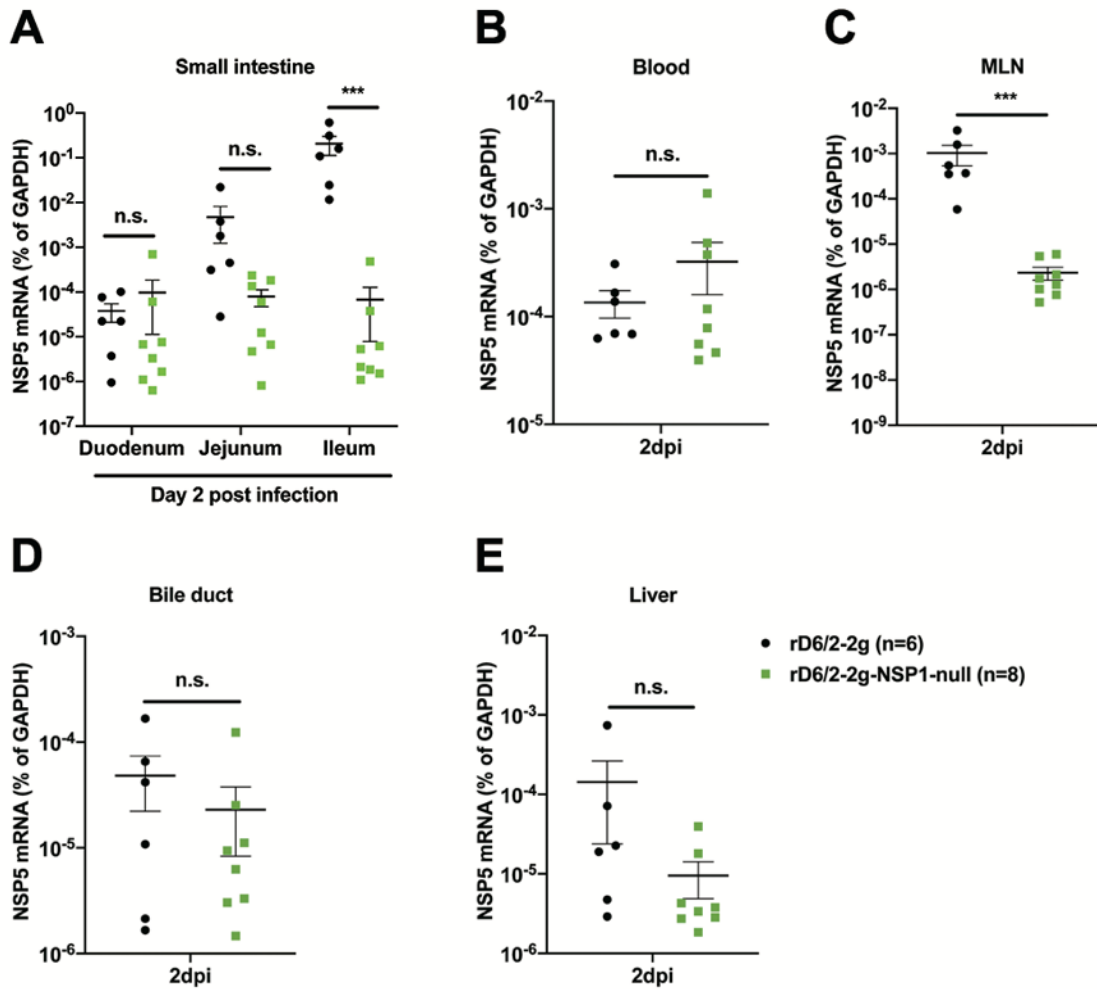

390

391 **Figure 5.** Viral loads of rD6/2-2g and rD6/2-2g-NSP1-null in the small intestines and  
392 indicated systemic sites in wild-type 129sv mice. (A) 5-day-old wild-type 129sv pups were  
393 orally infected with  $1.5 \times 10^3$  FFUs of rD6/2-2g and rD6/2-2g-NSP1-null. RNA was  
394 extracted from duodenum, jejunum, and ileum collected at 2 dpi and RT-qPCR was used  
395 to detect RV NSP5 mRNA levels. (B-E) Same as (A) except that blood, MLNs, bile duct,  
396 and liver were collected instead. \*\*\*  $P < 0.001$ ; n.s., not significant (unpaired student's  $t$   
397 test).



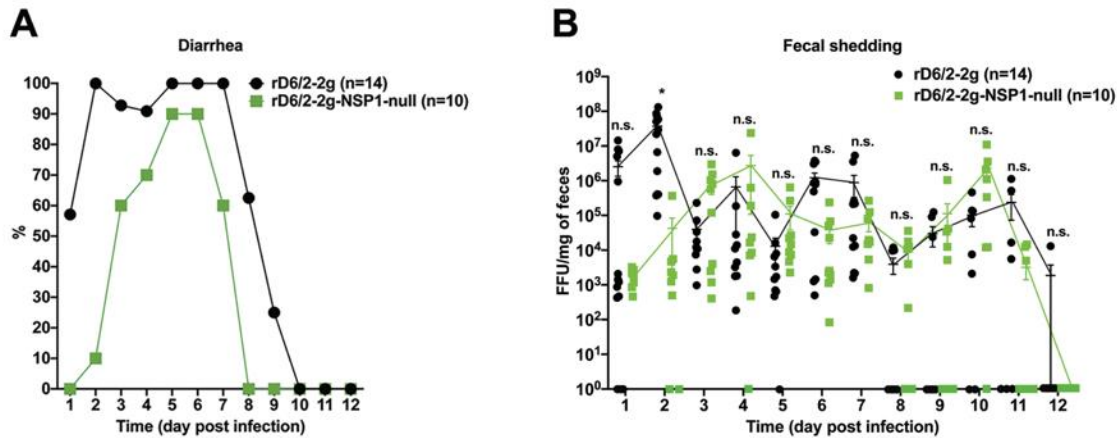

398

399 **Figure 6.** Characterization of diarrhea and fecal shedding of rD6/2-2g and rD6/2-2g-  
400 NSP1-null in *Stat1* KO 129sv mice. (A) 5-day-old *Stat1* KO 129sv mice were orally  
401 inoculated with  $1.5 \times 10^3$  FFUs of rD6/2-2g and rD6/2-2g-NSP1-null. The diarrhea rate was  
402 monitored from day 1 to 12 post infection. (B) Viral shedding in stool samples were  
403 detected by an FFU assay, and normalized by the feces weight. Virus shedding within  
404 one group on each day is shown as mean  $\pm$  SEM. \*  $P < 0.05$ ; n.s., not significant (two-way  
405 ANOVA test).

406

407

408

409

410

411

412

413

414

415

416

417

418

419

420

421

422

423

424

425

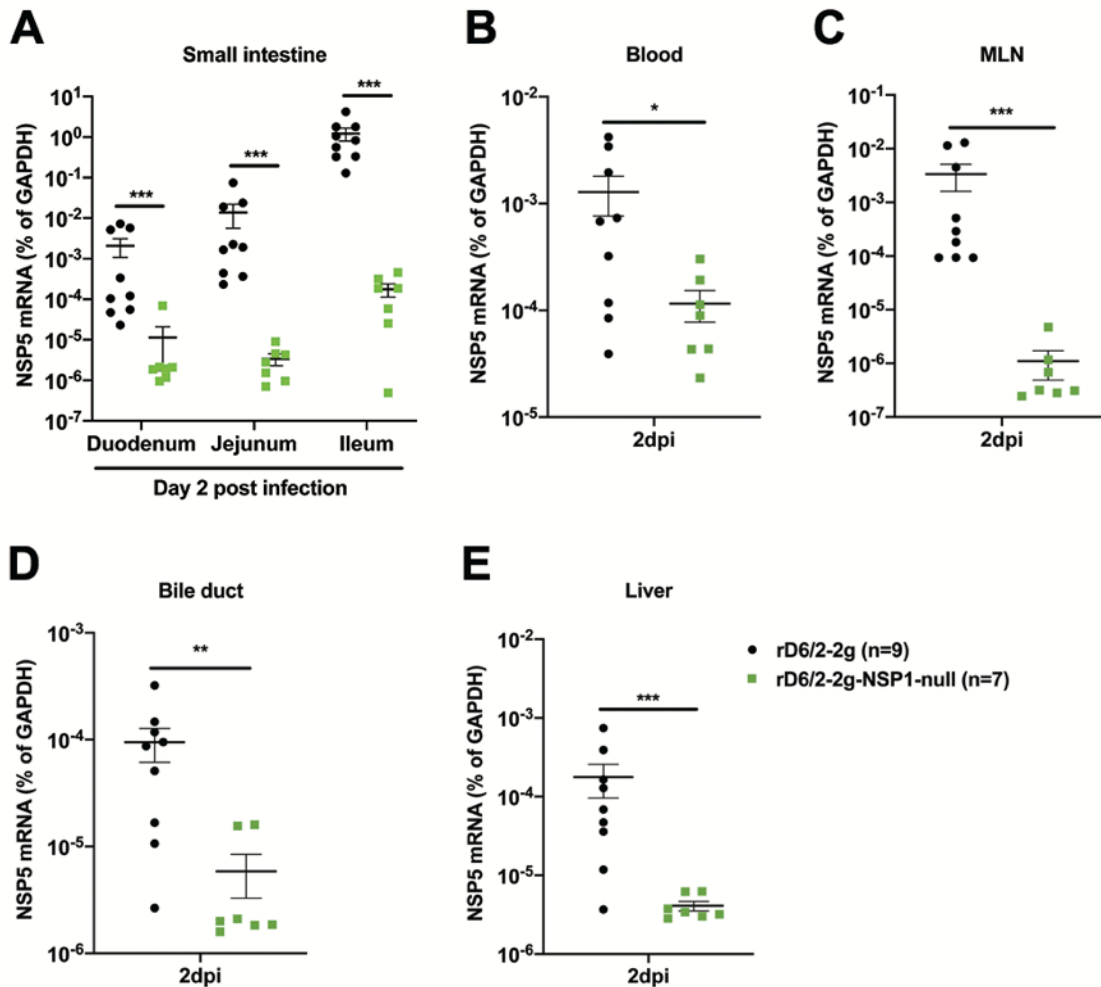

426

427 **Figure 7.** Viral loads of rD6/2-2g and rD6/2-2g-NSP1-null in the small intestines and  
428 indicated extra-intestinal tissues in *Stat1* KO 129sv mice. (A) 5-day-old *Stat1* KO 129sv  
429 pups were orally infected with  $1.5 \times 10^3$  FFUs of rD6/2-2g and rD6/2-2g-NSP1-null. The  
430 duodenum, jejunum, and ileum were collected at 2 dpi and RV NSP5 mRNA levels were  
431 detected by RT-qPCR. (B-E) Same as (A) except that blood, MLNs, bile duct, and liver  
432 were collected instead. \*  $P < 0.05$ ; \*\*  $P < 0.01$ ; \*\*\*  $P < 0.001$ ; n.s., not significant (unpaired  
433 student's *t* test).

434

435

436

437

438

439

440

441

442

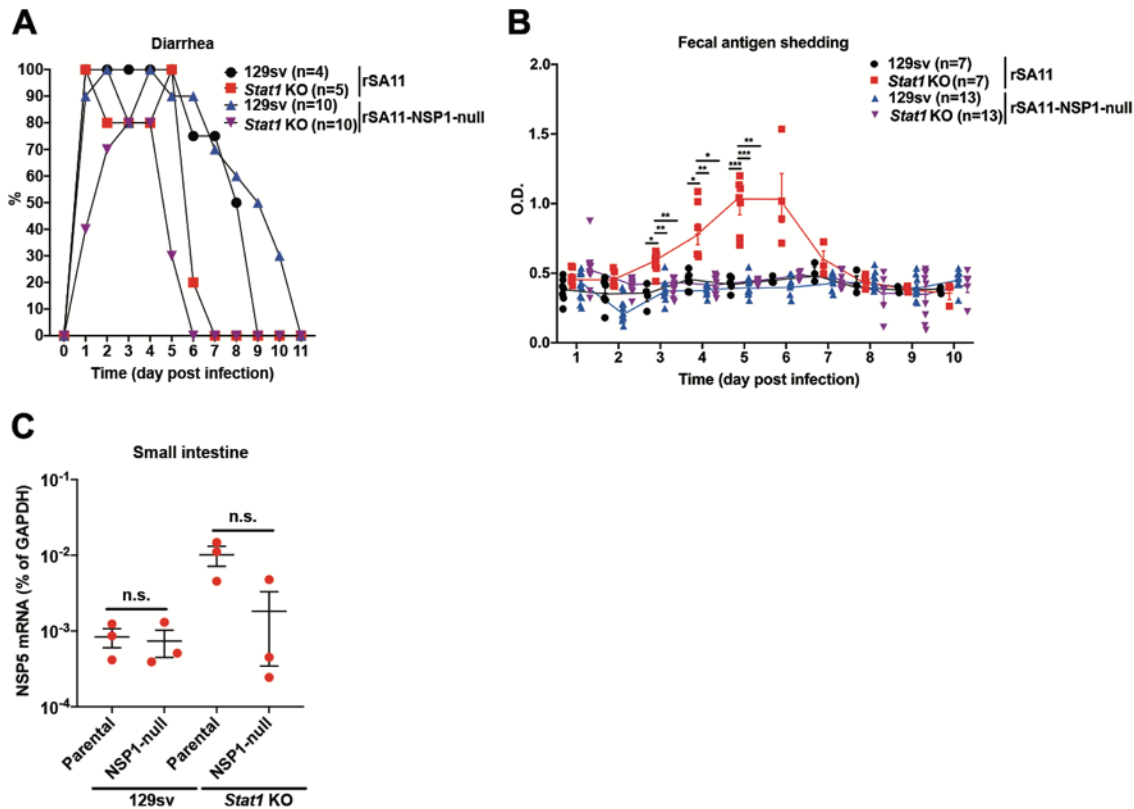

443

444 **Figure 8.** Characterization of diarrhea, fecal shedding, and replication of heterologous  
445 rSA11 and rSA11-NSP1-null in wild-type and *Stat1* KO 129sv mice. (A) 5-day-old wild-  
446 type and *Stat1* KO 129sv mice were orally infected with  $1 \times 10^7$  PFUs of rSA11 and rSA11-  
447 NSP1-null. Diarrheal development was recorded from day 0 to 11 post inoculation. (B)  
448 Stool samples were collected from 1 to 12 days post infection, and virus shedding in feces  
449 was measured by ELISA and plotted as optical density (O.D.) values. \*  $P < 0.05$ ; \*\*  $P < 0.01$ ;  
450 \*\*\*  $P < 0.001$ ; n.s., not significant (two-way ANOVA test). (C) Small intestinal tissues were  
451 collected at 5 dpi. Total RNA was extracted and RV NSP5 mRNA levels were detected by  
452 RT-qPCR. n.s., not significant (unpaired student's *t* test).

453

454

| NSP1 Reversion Ratio      |           |       |       |       |       |
|---------------------------|-----------|-------|-------|-------|-------|
|                           | Reversion | Day 1 | Day 2 | Day 3 | Day 4 |
| <b>WT 129sv</b>           | Complete  |       |       | 3/4   | 6/6   |
|                           | Mixed     |       |       | 1/4   | 0/6   |
| <b>Stat1 KO<br/>129sv</b> | Complete  | 2/8   | 2/7   | 8/9   | 8/8   |
|                           | Mixed     | 6/8   | 5/7   | 1/9   | 0/8   |

455 **Table 1.** NSP1 sequencing results from the fecal samples of wild-type and *Stat1* KO mice  
456 infected with rD6/2-2g-NSP1-null. Complete, 100% of both stop codons were completely  
457 reverted to wild-type sequences; mixed, only a portion of the viruses carrying the stop  
458 codons reverted to wild-type sequences.

459  
460  
461  
462  
463  
464  
465  
466  
467  
468  
469  
470  
471  
472  
473  
474  
475  
476  
477  
478  
479  
480  
481  
482  
483  
484  
485  
486

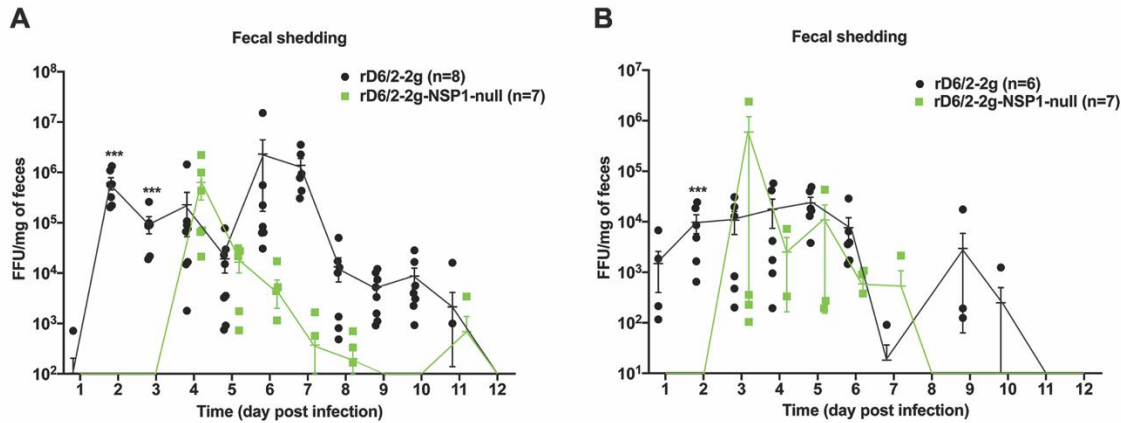

487

488

489

490

491

492

493

494

**Supplemental Figure 1.** Characterization of the virus shedding of rD6/2-2g and rD6/2-2g-NSP1-null in wild-type 129sv mice. **(A)** 5-day-old 129sv mice were orally inoculated with  $1.5 \times 10^3$  FFUs of rD6/2-2g and rD6/2-2g-NSP1-null. Viral shedding in stool samples were detected by an FFU assay and normalized by the feces weight. **(B)** Another two cages of suckling mice were orally infected as in **(A)**, and the fecal shedding was measured and normalized as described above. Virus shedding within the same group on each day is shown as mean  $\pm$  SEM. \*\*\*  $P < 0.001$  (two-way ANOVA test).



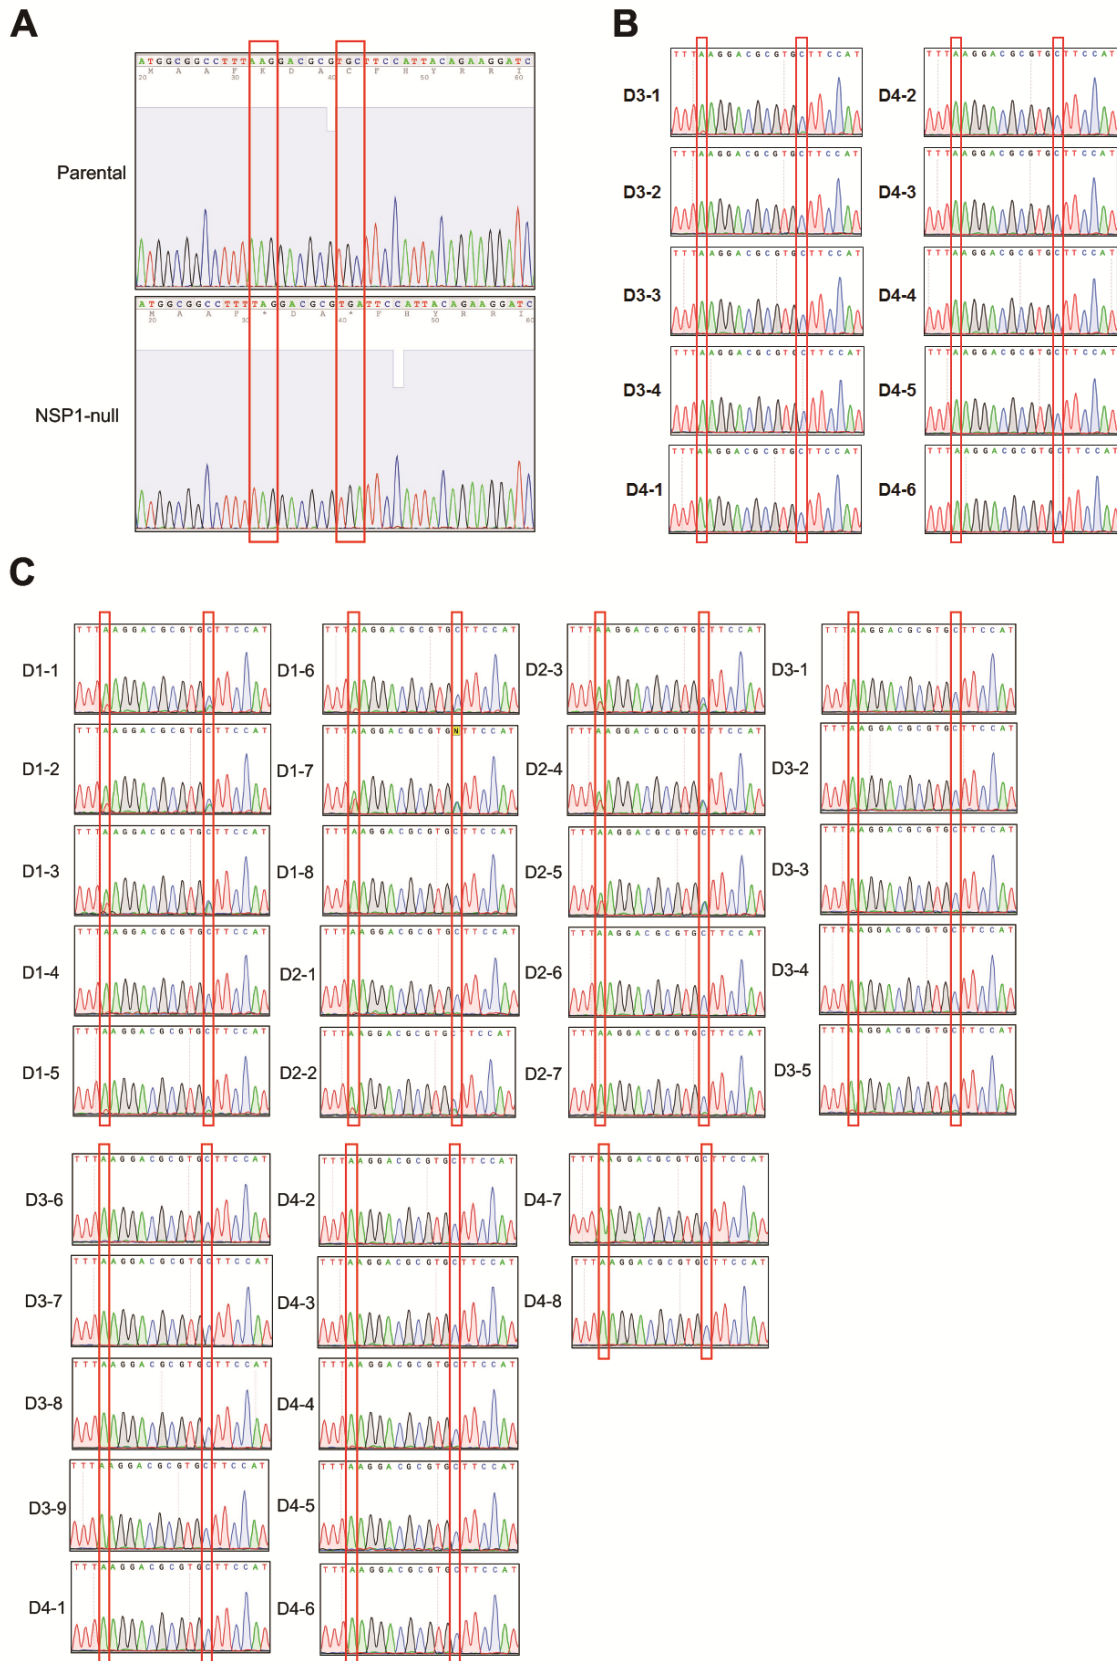

496 **Supplemental Figure 2.** Sanger sequencing of RV gene 5 fragment. **(A)** NSP1 fragments  
497 (17 to 466 nucleotides) were amplified from the rD6/2-2g and rD6/2-2g-NSP1-null virus  
498 stocks and analyzed by Sanger sequencing. **(B)** Same as **(A)** except that feces from  
499 rD6/2-2g-NSP1-null inoculated wild-type 129sv mice at day 3 and 4 post infection were  
500 analyzed instead. **(C)** Same as **(A)** except that feces from rD6/2-2g-NSP1-null inoculated  
501 *Stat1* KO 129sv mice at day 1 to 4 post infection were analyzed instead.  
502  
503

## 504 MATERIALS AND METHODS

505

### 506 Cells and viruses

507 The rhesus monkey kidney epithelial MA104 cells were grown in medium 199 (Gibco)  
508 supplemented with 10% heat-inactivated fetal bovine serum (FBS) (VWR), 100 U/ml  
509 penicillin, 100 µg/ml streptomycin, and 0.292 mg/ml L-glutamine. BHK-T7 cell, a baby  
510 hamster kidney cell line stably expressing T7 RNA polymerase was kindly gifted by Ursula  
511 Buchholz (Laboratory of Infectious Diseases, NIAID, NIH, USA), and was cultured  
512 in Dulbecco's modified Eagle's medium (DMEM) (Gibco) supplemented with 10% heat-  
513 inactivated FBS, 100 U/ml penicillin, 100 µg/ml streptomycin, and 0.292 mg/ml L-  
514 glutamine, and also 0.3 mg/ml G418 (Promega) was added to the culture medium at every  
515 other passage. MA104 cells stably expressing parainfluenza virus 5 V protein and bovine  
516 viral diarrhea virus N protease were cultured in medium 199 supplemented with 10%  
517 heat-inactivated FBS, 100 U/ml penicillin, 100 µg/ml streptomycin, 0.292 mg/ml L-  
518 glutamine. 10 µg/ml blasticidin and 10 µg/ml puromycin were added to the medium at  
519 every other passage as described previously (22).

520

521 The simian RV SA11 strain and the murine RV D6/2 strain were propagated as described  
522 previously (7, 19). Briefly, RV stock was activated with 5 µg/ml trypsin (Gibco Life  
523 Technologies, Carlsbad, CA) for 20 min at 37°C. The activated RV were incubated with  
524 MA104 cells, which were washed twice with serum free medium 199 for 1 h at 37°C. Then  
525 the viruses were removed and the new serum free medium 199 supplemented with 0.5  
526 µg/ml trypsin were added to the MA104 cells. Virus titers were determined by a standard  
527 plaque assay in MA104 cells.

528

### 529 Sequencing of the murine RV D6/2 strain

530 Viral particle enrichment of cell culture supernatant was performed based on the NetoVIR  
531 protocol (28). Briefly, cell culture supernatant was centrifuged for 3 min at 17,000 × g and  
532 filtered with a 0.8-µm PES filter (Sartorius). The filtrate was treated with benzonase  
533 (Novagen) and micrococcal nuclease (New England BioLabs) at 37°C for 2 h to remove  
534 the free-floating nucleic acids. Subsequently, samples were extracted using the QIAamp  
535 Viral RNA minikit (Qiagen) according to the manufacturer's instructions, without addition  
536 of carrier RNA to the lysis buffer. Reverse transcription and second strand synthesis were  
537 performed by an adjusted version of the whole-transcriptome amplification (WTA2)  
538 protocol (Sigma-Aldrich), as described previously (29). A sequencing library was  
539 constructed with the Nextera XT library preparation kit (Illumina). The size of the library  
540 was checked with Bioanalyzer (Agilent Technologies) with a high sensitivity DNA chip and  
541 the 2 nM pooled libraries were sequenced on an Illumina NextSeq 500 platform (2 × 150  
542 bp paired ends).

543

544 Low-quality reads, ambiguous bases, and primer and adapter sequences were removed

545 from the paired-end reads with Trimmomatic with default parameters (30). Trimmed reads  
546 were *de novo* assembled with metaSPAdes from SPAdes software using 21, 33, 55, and  
547 77 k-mer lengths (31). The obtained contigs were annotated with DIAMOND against a  
548 nonredundant protein database (32). Contigs annotated as “rotavirus” were extracted.  
549 The obtained sequences were verified *in silico* by remapping the trimmed reads to the  
550 obtained contigs using BWA software (33).

551

### 552 **Construction of a T7 plasmid encoding mutant gene 5 of D6/2 or SA11**

553 To rescue an NSP1-deficient murine-like RV, we generated a pT7-D6/2-NSP1-null via the  
554 QuikChange II site-directed mutagenesis kit (Agilent Technology) based on pT7-D6/2-  
555 NSP1 (22). Briefly, the AAG and TGC codons in the NSP1 ORF of D6/2 were replaced  
556 with stop codons TAG and TGA at nucleotide position 43 to 45, and 52 to 55 in pT7-D6/2-  
557 NSP1. The mutant primers used were:

558 rD6/2-2g-NSP1-null forward primer:

559 5'-GTGTTAGCCATGGCGGCCTTTTAGGACGCGTGATTCCATTACAGAAGG-3';

560 rD6/2-2g-NSP1-null reverse primer:

561 5'-CCTTCTGTAATGGAATCACGCGTCCTAAAAGGCCGCCAT GGCTAACAC-3'.

562 To rescue the NSP1-deficient simian RV SA11, we generated the plasmid pT7-SA11-  
563 NSP1-null using the same strategies described above. The mutant primers used were:

564 SA11-NSP1-null forward primer:

565 5'-GCTACTTTTAAAGATGCATGCTTTTAAATAGCGTAGATTAAGTCTTTAAATCGG-3';

566 SA11-NSP1-null reverse primer:

567 5'-CCGATTTAAAGCAGTTAATCTACGCTATTAAAAGCATGCATCTTTAAAAGTAGC-3'.

568

### 569 **Generation of recombinant murine like and simian RVs**

570 Recombinant rD6/2-2g and rD6/2-2g-NSP1-null were generated according to the  
571 optimized entirely plasmid-based RG system described recently (22). Briefly, 0.4 µg of  
572 pT7-SA11-VP1, pT7-D6/2-VP2, pT7-D6/2-VP3, pT7-D6/2-VP4, pT7-D6/2-VP6, pT7-  
573 D6/2-VP7, pT7-D6/2-NSP1 (or pT7-rD6/2-NSP1-null), pT7-D6/2-NSP3, and pT7-SA11-  
574 NSP4, 1.2 µg of pT7-D6/2-NSP2 and pT7-D6/2-NSP5, 0.8 µg of the helper plasmid C3P3-  
575 G1, and 14 µl TransIT-LT1 (Mirus) transfection reagent were mixed together and  
576 transfected into BHK-T7 cells in 12-well plate. 18 h later, the transfected BHK-T7 cells  
577 were washed twice with FBS-free DMEM, then supplemented with 800 µl fresh FBS-free  
578 DMEM, 24 h later,  $1 \times 10^5$  MA104 N\*V cells in 200 µl FBS-free DMEM along with 0.5 µg/ml  
579 trypsin were added to the transfected BHK-T7 cells for another 3 days. After that, mixed  
580 cells were frozen and thawed for 3 times. The rescued virus was propagated for two  
581 passages in MA104 cells in 6-well plate, then the virus was propagated in T75 flask to  
582 produce the virus stock.

583

584 The recombinant SA11 and SA11-NSP1-null were rescued using the same protocol  
585 described above, expect that the plasmids used were pT7-SA11-VP1, pT7-SA11-VP2,

586 pT7-SA11-VP3, pT7-SA11-VP4, pT7-SA11-VP6, pT7-SA11-VP7, pT7-SA11-NSP1 (or  
587 pT7-SA11-NSP1-null), pT7-SA11-NSP2, pT7-SA11-NSP3, pT7-SA11-NSP4, and pT-  
588 SA11-NSP5.

589

### 590 **Purification of RV particles by sucrose gradient centrifugation**

591 RVs were concentrated by sucrose cushion as described previously (34). Briefly, RVs  
592 propagated in T75 flasks were harvested by repeat the freeze-thaw cycle three times.  
593 Then we clarified the crude lysate of cell debris by centrifugation at 3,000 × g for 1 h at  
594 4°C. After that, 8 ml of clarified RVs were placed into a 10 ml SW44 ultracentrifuge tube,  
595 and 2 ml 40% sucrose (w/v) was carefully added to the bottom of the ultracentrifuge tube,  
596 and subjected to centrifugation at 35,000 rpm for 3 h at 4°C. At last, we removed the  
597 supernatant, and add 200 µl FBS-free medium 199 to resuspend the concentrated RVs  
598 at 4°C overnight.

599

### 600 **Electrophoretic analysis of viral genomic dsRNAs**

601 Viral genomic dsRNAs were extracted from sucrose cushion concentrated viruses using  
602 TRIzol reagent (Thermo Scientific) according to the manufacture's protocol (35). Then the  
603 dsRNAs were mixed with gel loading dye, purple (6×) (New England Biolabs). Samples  
604 were loaded into a 4-15% precast polyacrylamide gel, and running for 3 h at 180 volts.  
605 Gel was stained for 1 h with 0.1 µg/ml ethidium bromide and visualized by ChemiDoc MP  
606 Imaging System (Bio-Rad).

607

### 608 **Restriction enzyme digestion and sequencing analysis**

609 The total RNA of the recombinant rD6/2-2g, rD6/2-2g-NSP1-null virus stocks, and stool  
610 samples was extracted by TRIzol. Total RNA was reverse transcribed to complementary  
611 DNA using High Capacity cDNA Reverse Transcription Kit with RNase Inhibitor (Applied  
612 Biosystems) according to the user guide. Briefly, 0.8 µg of RNA, 2 µl of 10× RT Buffer,  
613 0.8 µl of 100 mM dNTP Mix, 2 µl of RT random primers, 0.1 µl of RNase Inhibitor, 0.1 µl  
614 of MultiScribe Reverse Transcriptase, and flexible amount of nuclease-free H<sub>2</sub>O were  
615 added to the 20 µl reaction. Reverse transcription thermocycling program was set at 25°C  
616 for 10 min, 37°C for 2 h, and 85°C for 5 min.

617

618 NSP1 5' end fragments were amplified by Phusion Hot Start II DNA Polymerase (Thermo  
619 Scientific) following the manufacturer's guide. The primers used for PCR were: NSP1  
620 forward primer: 5'-GTCTTGTGTTAGCCATGGC-3', NSP1 reverse primer: 5'-  
621 CAGCGTTAAAGTGATCGG-3'. PCR products were gel-purified using QIAquick Gel  
622 Extraction Kit (QIAGEN). 0.1 µg of NSP1 fragments were digested by restriction enzyme  
623 *HinfI* (NEB) for 1 h at 37°C. The enzyme digested products were separated by 2%  
624 agarose gel electrophoresis, stained by ethidium bromide, and visualized by ChemiDoc  
625 MP Imaging System (Bio-Rad). A separate set of purified NSP1 fragments were sent for  
626 Sanger sequencing using the NSP1 reverse primer.



627

## 628 **Immunoblotting**

629 MA104 cells in 24-well plate were infected by rD6/2-2g or rD6/2-2g-NSP1-null at an MOI  
630 of 3 for 6 h. Then uninfected and infected MA104 cells were washed twice by ice-cold  
631 phosphate-buffered saline (PBS; Thermo Scientific), and lysed in RIPA buffer (150 mM  
632 NaCl, 1.0% IGEPAL CA-630, 0.5% sodium deoxycholate, 0.1% SDS, 50 mM Tris, pH 8.0;  
633 Sigma-Aldrich) supplemented with 1× protease inhibitor cocktail (Thermo Scientific) for  
634 30 min at 4°C. After that, cell debris was removed by centrifuge at 12,000 ×g for 10 min  
635 at 4°C. Samples were resolved in precast SDS-PAGE gel (4-15%; Bio-Rad) and  
636 transferred to nitrocellulose membrane (0.45 μm; Bio-Rad). The membrane was  
637 incubated with blocking buffer (5% bovine serum albumin (BSA) diluted in PBS  
638 supplemented with 0.1% Tween 20) for 1 h at room temperature. Then the membrane  
639 was incubated with anti-IRF3 rabbit monoclonal antibody (CST, #4302, 1:1000), anti-RV  
640 VP6 mouse monoclonal antibody (Santa Cruz Biotechnology, sc-101363, 1:1000), anti-  
641 GAPDH rabbit monoclonal antibody (CST, #2118, 1:1000), followed by incubation with  
642 anti-mouse IgG (CST, #7076, 1:5000) or anti-rabbit IgG (CST, #7074, 1:5000)  
643 horseradish peroxidase-linked (HRP) antibodies. The antigen-antibody complex was  
644 detected using Clarity Western ECL substrate (Bio-Rad), and ChemiDoc MP Imaging  
645 System according to the manufacturer's manuals.

646

## 647 **RT-QPCR**

648 RT-qPCR was performed using the above cDNA as described previously (23). The  
649 expression level of housekeeping gene GAPDH was quantified by 2× SYBR Green  
650 Master Mix (Applied Biosystems), and NSP5 was measured by 2× TaqMan Fast  
651 Advanced Master Mix (Applied Biosystems). The primers used in this study were as  
652 follows: human GAPDH forward primer: 5'-GGAGCGAGATCCCTCCAAAAT-3', reverse  
653 primer: 5'-GGCTGTTGTCATACTTCTCATGG-3'; mouse GAPDH forward primer: 5'-  
654 TCTGGAAAGCTGTGCCGTG-3', reverse primer: 5'-CCAGTGAGC TTCCCGTTCA G-3';  
655 NSP5 forward primer: 5'-CTGCTTCAAACGATCCACTCAC-3', reverse primer:  
656 5'-TGAATCCATAGACACGCC-3', probe: 5'-CY5/TCAAATGCAGTTAAGAC  
657 AAATGCAGACGCT/IABRQSP-3'.

658

## 659 **Plaque assay**

660 Plaque assay was performed as described previously (36). Briefly, 1×10<sup>5</sup> cells/ml MA104  
661 cells were seeded in 6-well plate and virus samples were serially diluted 10-fold and  
662 incubated with the confluent MA104 cells for 1 h at 37°C. Then samples were replaced  
663 by FBS-free medium 199 with 0.1% agarose supplemented with 0.5 μg/ml trypsin and put  
664 back to 37°C. Plaques were visualized at day 3 to day 5 post inoculation by 0.0165%  
665 neutral red staining. In order to measure the size of the plaques, we recorded more than  
666 75 plaques by the microscope (ECHO) in two different experiments. Then the diameters  
667 of the plaques were calculated by the annotation tool of the microscope.

668

### 669 **Focus-forming unit assay**

670 Focus-forming assay was conducted as described previously (35). Briefly,  $1 \times 10^5$  cells/ml  
671 MA104 cells were seeded in 96-well plate, then virus samples were serially diluted 5 or  
672 10-fold and incubated with a monolayer of MA104 cells for 10 h or overnight at 37°C.  
673 Then cells were fixed by 10% formalin, followed by permeabilized with 1% Tween 20.  
674 After that cells were incubated with anti-rotavirus capsid mouse monoclonal antibody and  
675 anti-mouse HRP-linked antibodies. The foci were stained by 3-amino-9-ethylcarbazole  
676 HRP substrate (Vector laboratories) and stopped by wash twice with PBS.

677

### 678 **Mice infection**

679 Wild-type 129S1/SvImJ or *Stat1* KO mice were purchased from the Jackson Laboratory  
680 and Taconic Biosciences, respectively, and bred locally at the WUSTL BJCIH vivarium.  
681 5-day-old suckling pups were orally infected with rescued rD6/2-2g ( $1.5 \times 10^3$  FFU) and  
682 rD6/2-2g-NSP1-null ( $1.5 \times 10^3$  FFU) (37). Diarrhea was evaluated from day 1 to day 12  
683 post infection. In the meantime, feces from infected mice were also collected, and focus-  
684 forming assay was used to titrate RV in stool samples. Briefly, 50  $\mu$ l PBS with calcium  
685 and magnesium was added to the 1.5 ml Eppendorf tubes, and the weight was recorded.  
686 After we collected the feces, these tubes were weighted again, and the stool samples  
687 were homogenized before we made the serial dilution to conduct the focus-forming assay.  
688 Duodenum, jejunum, ileum, blood, mesenteric lymph node, and liver were collected from  
689 inoculated pups at day 2 post infection, and immediately placed in liquid nitrogen and  
690 stored at -80°C until use. RNA was extracted from those tissues using RNeasy Plus Mini  
691 Kit (QIAGEN) according to the manufacturer's protocol. RT-qPCR was used to measure  
692 RV NSP5 expression level as described previously (38).

693

### 694 **Statistical analysis**

695 Bar graphs in **Fig. 2A-C** and **3A-B** were displayed as means  $\pm$  standard deviation (SD).  
696 Bar graphs in **Fig. 4B, 5A-E, 6B, 7A-E, 8B-C, and S1** were displayed as means  $\pm$   
697 standard error of mean (SEM). Statistical significance in **Fig. 2A-C, 3A-B, 5A-E, 7A-E,**  
698 **and 8C** was analyzed by unpaired Student's *t* test using GraphPad Prism 9.1.1. The  
699 asterisks in unpaired Student's *t* test analyzed data represent \*  $P < 0.05$ ; \*\*  $P < 0.01$ ; \*\*\*  
700  $P < 0.001$ ; n.s., not significant. Statistical significance in **Fig. 4B, 6B, 8B, and S1** was  
701 calculated by Two-way ANOVA using GraphPad Prism 9.1.1. The asterisks in Two-way  
702 ANOVA analyzed data represent \*  $P < 0.05$ ; \*\*  $P < 0.01$ ; \*\*\*  $P < 0.001$ ; n.s., not significant.

703

### 704 **FUNDING**

705 This study is supported by the National Institutes of Health (NIH) DDRCC grant P30  
706 DK052574, NIH grants K99/R00 AI135031 and R01 AI150796 to S.D.

707

### 708 **ACKNOWLEDGEMENTS**

709 The authors thank members of the Greenberg lab (Stanford University, USA) and Ding  
710 lab (Washington University in St. Louis) for constructive comments and suggestions. We  
711 very much appreciate Drs. Nathan J. Meade and Kenneth H. Mellits for kindly sharing the  
712 MA104-N\*V cells and Dr. Phillippe H. Jais for sharing the C3P3 plasmid.

713

714

715

716

## 717 REFERENCES

- 718 1. Dennehy PH. 2008. Rotavirus vaccines: an overview. *Clin Microbiol Rev* 21:198-208.
- 719 2. Crawford SE, Ramani S, Tate JE, Parashar UD, Svensson L, Hagbom M, Franco MA, Greenberg HB, O’Ryan  
720 M, Kang G, Desselberger U, Estes MK. 2017. Rotavirus infection. *Nat Rev Dis Primers* 3:17083.
- 721 3. Aliabadi N, Antoni S, Mwenda JM, Weldegebriel G, Biey JNM, Cheikh D, Fahmy K, Teleb N, Ashmony HA,  
722 Ahmed H, Daniels DS, Videbaek D, Wasley A, Singh S, de Oliveira LH, Rey-Benito G, Sanwogou NJ,  
723 Wijesinghe PR, Liyanage JBL, Nyambat B, Grabovac V, Heffelfinger JD, Fox K, Paladin FJ, Nakamura T,  
724 Agócs M, Murray J, Cherian T, Yen C, Parashar UD, Serhan F, Tate JE, Cohen AL. 2019. Global impact of  
725 rotavirus vaccine introduction on rotavirus hospitalisations among children under 5 years of age, 2008–16:  
726 findings from the Global Rotavirus Surveillance Network. *The Lancet Global Health* 7:e893-e903.
- 727 4. Troeger C, Khalil IA, Rao PC, Cao S, Blacker BF, Ahmed T, Armah G, Bines JE, Brewer TG, Colombara  
728 DV, Kang G, Kirkpatrick BD, Kirkwood CD, Mwenda JM, Parashar UD, Petri WA, Jr., Riddle MS, Steele  
729 AD, Thompson RL, Walson JL, Sanders JW, Mokdad AH, Murray CJL, Hay SI, Reiner RC, Jr. 2018.  
730 Rotavirus Vaccination and the Global Burden of Rotavirus Diarrhea Among Children Younger Than 5 Years.  
731 *JAMA Pediatr* 172:958-965.
- 732 5. Uygungil B, Blessing JJ, Risma KA, McNeal MM, Rothenberg ME. 2010. Persistent rotavirus vaccine  
733 shedding in a new case of severe combined immunodeficiency: A reason to screen. *Journal of Allergy and  
734 Clinical Immunology* 125:270-271.
- 735 6. Velazquez FR. 2009. Protective effects of natural rotavirus infection. *Pediatr Infect Dis J* 28:S54-6.
- 736 7. Feng N, Yasukawa LL, Sen A, Greenberg HB. 2013. Permissive replication of homologous murine rotavirus  
737 in the mouse intestine is primarily regulated by VP4 and NSP1. *J Virol* 87:8307-16.
- 738 8. Sen A, Feng N, Ettayebi K, Hardy ME, Greenberg HB. 2009. IRF3 inhibition by rotavirus NSP1 is host cell  
739 and virus strain dependent but independent of NSP1 proteasomal degradation. *J Virol* 83:10322-35.
- 740 9. Barro M, Patton JT. 2005. Rotavirus nonstructural protein 1 subverts innate immune response by inducing  
741 degradation of IFN regulatory factor 3. *Proc Natl Acad Sci U S A* 102:4114-9.
- 742 10. Sen A, Rott L, Phan N, Mukherjee G, Greenberg HB. 2014. Rotavirus NSP1 protein inhibits interferon-  
743 mediated STAT1 activation. *Journal of virology* 88:41-53.
- 744 11. Graff JW, Ettayebi K, Hardy ME. 2009. Rotavirus NSP1 inhibits NFκB activation by inducing proteasome-  
745 dependent degradation of β-TrCP: a novel mechanism of IFN antagonism. *PLoS Pathog* 5:e1000280.
- 746 12. Arnold MM, Patton JT. 2011. Diversity of interferon antagonist activities mediated by NSP1 proteins of  
747 different rotavirus strains. *J Virol* 85:1970-9.
- 748 13. Graff JW, Mitzel DN, Weisend CM, Flenniken ML, Hardy ME. 2002. Interferon regulatory factor 3 is a  
749 cellular partner of rotavirus NSP1. *J Virol* 76:9545-50.
- 750 14. Arnold MM, Barro M, Patton JT. 2013. Rotavirus NSP1 mediates degradation of interferon regulatory factors  
751 through targeting of the dimerization domain. *J Virol* 87:9813-21.
- 752 15. Barro M, Patton JT. 2007. Rotavirus NSP1 inhibits expression of type I interferon by antagonizing the  
753 function of interferon regulatory factors IRF3, IRF5, and IRF7. *J Virol* 81:4473-81.
- 754 16. Lutz LM, Pace CR, Arnold MM. 2016. Rotavirus NSP1 Associates with Components of the Cullin RING  
755 Ligase Family of E3 Ubiquitin Ligases. *J Virol* 90:6036-48.
- 756 17. Ding S, Mooney N, Li B, Kelly MR, Feng N, Loktev AV, Sen A, Patton JT, Jackson PK, Greenberg HB. 2016.  
757 Comparative Proteomics Reveals Strain-Specific beta-TrCP Degradation via Rotavirus NSP1 Hijacking a

- 758 Host Cullin-3-Rbx1 Complex. *PLoS Pathog* 12:e1005929.
- 759 18. Holloway G, Dang VT, Jans DA, Coulson BS. 2014. Rotavirus inhibits IFN-induced STAT nuclear  
760 translocation by a mechanism that acts after STAT binding to importin-alpha. *J Gen Virol* 95:1723-1733.
- 761 19. Kanai Y, Komoto S, Kawagishi T, Nouda R, Nagasawa N, Onishi M, Matsuura Y, Taniguchi K, Kobayashi  
762 T. 2017. Entirely plasmid-based reverse genetics system for rotaviruses. *Proc Natl Acad Sci U S A* 114:2349-  
763 2354.
- 764 20. Komoto S, Fukuda S, Ide T, Ito N, Sugiyama M, Yoshikawa T, Murata T, Taniguchi K. 2018. Generation of  
765 Recombinant Rotaviruses Expressing Fluorescent Proteins by Using an Optimized Reverse Genetics System.  
766 *J Virol* 92.
- 767 21. Feng N, Kim B, Fenaux M, Nguyen H, Vo P, Omary MB, Greenberg HB. 2008. Role of interferon in  
768 homologous and heterologous rotavirus infection in the intestines and extraintestinal organs of suckling mice.  
769 *J Virol* 82:7578-90.
- 770 22. Sanchez-Tacuba L, Feng N, Meade NJ, Mellits KH, Jais PH, Yasukawa LL, Resch TK, Jiang B, Lopez S,  
771 Ding S, Greenberg HB. 2020. An Optimized Reverse Genetics System Suitable for Efficient Recovery of  
772 Simian, Human, and Murine-Like Rotaviruses. *J Virol* 94.
- 773 23. Ding S, Zhu S, Ren L, Feng N, Song Y, Ge X, Li B, Flavell RA, Greenberg HB. 2018. Rotavirus VP3 targets  
774 MAVS for degradation to inhibit type III interferon expression in intestinal epithelial cells. *Elife* 7:e39494.
- 775 24. Patton JT, Taraporewala Z, Chen D, Chizhikov V, Jones M, Elhelu A, Collins M, Kearney K, Wagner M,  
776 Hoshino Y, Gouvea V. 2001. Effect of intragenic rearrangement and changes in the 3' consensus sequence on  
777 NSP1 expression and rotavirus replication. *J Virol* 75:2076-86.
- 778 25. Zhao W, Xia M, Bridges-Malveo T, Cantu M, McNeal MM, Choi AH, Ward RL, Sestak K. 2005. Evaluation  
779 of rotavirus dsRNA load in specimens and body fluids from experimentally infected juvenile macaques by  
780 real-time PCR. *Virology* 341:248-56.
- 781 26. Pannacha P, Kanai Y, Kawagishi T, Nouda R, Nurdin JA, Yamasaki M, Nomura K, Lusiany T, Kobayashi T.  
782 2021. Generation of recombinant rotaviruses encoding a split NanoLuc peptide tag. *Biochem Biophys Res*  
783 *Commun* 534:740-746.
- 784 27. Zhu S, Ding S, Wang P, Wei Z, Pan W, Palm NW, Yang Y, Yu H, Li HB, Wang G, Lei X, de Zoete MR, Zhao  
785 J, Zheng Y, Chen H, Zhao Y, Jurado KA, Feng N, Shan L, Kluger Y, Lu J, Abraham C, Fikrig E, Greenberg  
786 HB, Flavell RA. 2017. Nlrp9b inflammasome restricts rotavirus infection in intestinal epithelial cells. *Nature*  
787 546:667-670.
- 788 28. Conceicao-Neto N, Zeller M, Lefrere H, De Bruyn P, Beller L, Deboutte W, Yinda CK, Lavigne R, Maes P,  
789 Van Ranst M, Heylen E, Matthijnsens J. 2015. Modular approach to customise sample preparation  
790 procedures for viral metagenomics: a reproducible protocol for virome analysis. *Sci Rep* 5:16532.
- 791 29. Yinda CK, Zeller M, Conceicao-Neto N, Maes P, Deboutte W, Beller L, Heylen E, Ghogomu SM, Van Ranst  
792 M, Matthijnsens J. 2016. Novel highly divergent reassortant bat rotaviruses in Cameroon, without evidence  
793 of zoonosis. *Sci Rep* 6:34209.
- 794 30. Bolger AM, Lohse M, Usadel B. 2014. Trimmomatic: a flexible trimmer for Illumina sequence data.  
795 *Bioinformatics* 30:2114-20.
- 796 31. Nurk S, Meleshko D, Korobeynikov A, Pevzner PA. 2017. metaSPAdes: a new versatile metagenomic  
797 assembler. *Genome Res* 27:824-834.
- 798 32. Buchfink B, Xie C, Huson DH. 2015. Fast and sensitive protein alignment using DIAMOND. *Nature*

- 799           Methods 12:59-60.
- 800    33.    Li H, Durbin R. 2010. Fast and accurate long-read alignment with Burrows-Wheeler transform.  
801           Bioinformatics 26:589-95.
- 802    34.    Ali A, Roossinck MJ. 2007. Rapid and efficient purification of Cowpea chlorotic mottle virus by sucrose  
803           cushion ultracentrifugation. J Virol Methods 141:84-6.
- 804    35.    Horie Y, Nakagomi O, Koshimura Y, Nakagomi T, Suzuki Y, Oka T, Sasaki S, Matsuda Y, Watanabe S. 1999.  
805           Diarrhea induction by rotavirus NSP4 in the homologous mouse model system. Virology 262:398-407.
- 806    36.    Shaw RD, Hempson SJ, Mackow ER. 1995. Rotavirus diarrhea is caused by nonreplicating viral particles.  
807           Journal of virology 69:5946-5950.
- 808    37.    Caddy SL, Vaysburd M, Wing M, Foss S, Andersen JT, O'Connell K, Mayes K, Higginson K, Iturriza-Gomara  
809           M, Desselberger U, James LC. 2020. Intracellular neutralisation of rotavirus by VP6-specific IgG. PLoS  
810           Pathog 16:e1008732.
- 811    38.    Bolen CR, Ding S, Robek MD, Kleinstein SH. 2014. Dynamic expression profiling of type I and type III  
812           interferon-stimulated hepatocytes reveals a stable hierarchy of gene expression. Hepatology 59:1262-72.
- 813
